# Supplementary material for: The Public Health Burden of Cardiomyopathies: Insights from a Nationwide Inpatient Study
Source: MDPI journal article supplement (doi:10.3390/jcm9040920), 2020-03-27

## Online-Only Supplements

### (Supplementary text & tables)

**Text S1.** Additional results

**Table S1.** ICD-10 code classification used for cardiomyopathies and for clinical events.

**Table S2.** Codes used in France for procedures during hospitalization: CCAM or “Classification Commune des Actes Médicaux”

**Table S3.** Inpatient prevalence of patients with cardiomyopathies per sex and per age classes

**Figure S1.** Flowchart of distinct patients who experienced at least one cardiomyopathy-related hospitalization from 2008 to 2015 in France.

### Text S1. Additional results

#### Heart failure

Of all cases of patients hospitalized for heart failure (HF) over the study period, cardiomyopathies accounted for 11.3%. The median age of cardiomyopathy patients hospitalized for HF was 76 years, and of patients 59% were males in 2015. The distribution of cardiomyopathy subtypes (Table 3) was as follows: 53% for dilated cardiomyopathy (DCM), 7% for hypertrophic cardiomyopathy (HCM), 1% for restrictive cardiomyopathy (RCM), and 35% for other cardiomyopathy (OCM). The temporal evolution of HF hospitalizations is described in Figure 2. The annual prevalence of patients with cardiomyopathies who experienced at least one heart failure episode increased nonsignificantly from 571 per million inhabitants (PMI) in 2008 to 618 PMI in 2015 (+8%, AAPC: +0.94(0.7;2.6),  $p>0.05$ ), with a significant increase for DCM and RCM but a decrease for HCM (Table 3).

#### Cardiac arrest

Cardiac arrest (CA) associated with cardiomyopathies includes sudden death, cardiac arrest, and aborted cardiac arrest. Of all cases of CA, cardiomyopathies accounted for 5%. The median age of patients was 65 years, and males were predominant (62% in 2015). The distribution of cardiomyopathy subtypes was 46%

for DCM, 11% for HCM, 4% for RCM, and 39% for OCM. The prevalence of cardiac arrest in cardiomyopathy patients increased over the study period: 20.3 PMI in 2008 to 28.9 PMI in 2015 (+42%, AAPC: +4.16%, [1.76;6.63],  $p=0.0053$ ). This was mainly explained by the increased proportion of cardiac arrests with successful resuscitation (9.6 PMI in 2008 to 16.7 PMI in 2015) and was observed for all cardiomyopathies.

### **Heart transplant**

Of all heart transplants (HTx) reported in the PMSI/DRG database over the study period, cardiomyopathies accounted for the largest proportion of patients (51% of all HTx). The median age of transplanted cardiomyopathy patients was 47 years; males were predominant (70% in 2008 and in 2015). The distribution of cardiomyopathy subtypes (Table 4) was 52% for DCM, 9% for HCM, 9% for RCM and 30% for OCM. The temporal evolution of HTx is described in Figure 2. We observed that the number of HTx in patients with cardiomyopathies increased from 2.7 PMI in 2008 to 3.6 in 2015 (+33%, AAPC: +3.86%, [2.13;5.61],  $p<0.0015$ ). This increase was especially observed for DCM (1.4 PMI in 2008 to 2.1 in 2015, +50%, AAPC=+5.65, [2.69;8.7],  $p=0.0032$ ), whereas stability was observed for HCM, RCM, and OCM subtypes (Table 4).

According to the CRISTAL database (a national database dedicated to heart transplants), cardiomyopathies accounted for 54% of all heart transplants over the study period, whereas ischemic heart diseases accounted for 34%. The contribution of cardiomyopathy subtypes to the total number of HTx in CRISTAL was 39% for DCM (versus 27% in DRG/PMSI database), 6.9% for other (versus 15% in DRG/PMSI database), 4.4% for HCM (versus 4.5% in DRG/PMSI database), and 3.3% for RCM (versus 4.4% in DRG/PMSI database).

### **Automatic implantable cardioverter-defibrillator (AICD)**

Of all AICDs implanted in France over the study period, cardiomyopathies accounted for 33%. The median age of cardiomyopathy patients with AICD implantation was 63 years, and males were predominant (72% in 2015). The distribution of cardiomyopathy subtypes (Table 4) was 60% for DCM, 10% for HCM, 3% for RCM, and 27% for OCM. Figure 2 describes the temporal evolution of AICD. The annual prevalence of cardiomyopathy patients who underwent a defibrillator implantation drastically increased from 33 PMI in

2008 to 55 PMI in 2015 (+65%, AAPC: +6.98%, (3.68;10.38),  $p < 10^{-4}$ ). The increase was observed for all cardiomyopathy subtypes (Table 4).

**Table S1.** ICD-10 code classification used for cardiomyopathies and for clinical events.

| Group of cardiomyopathies         | ICD 10 codes | ICD code heading                                                                              |
|-----------------------------------|--------------|-----------------------------------------------------------------------------------------------|
| Dilated cardiomyopathy (DCM)      | I420         | Dilated cardiomyopathies                                                                      |
|                                   | I426         | OH (alcoholic) cardiomyopathies                                                               |
|                                   | I427         | Nutritional cardiomyopathies                                                                  |
|                                   | I432         | Cardiomyopathies due to drugs or external causes                                              |
| Restrictive cardiomyopathy (RCM)  | I423         | Endomyocardial disease                                                                        |
|                                   | I424         | Endocardial fibroelastosis                                                                    |
|                                   | I425         | Restrictive cardiomyopathies                                                                  |
|                                   | I431         | Cardiomyopathies in metabolic diseases                                                        |
| Hypertrophic cardiomyopathy (HCM) | I421         | HCM obstructive                                                                               |
|                                   | I422         | HCM non obstructive                                                                           |
| Other cardiomyopathies (OCM)      | I428         | Other cardiomyopathies (including Takotsubo, Arrhythmogenic right ventricular cardiomyopathy) |
|                                   | I429         | Unspecified Cardiomyopathies                                                                  |
|                                   | I430         | Cardiomyopathy in infectious and parasitic diseases classified elsewhere                      |
|                                   | I438         | Cardiomyopathy in diseases classified elsewhere                                               |
|                                   | O903         | Peripartum cardiomyopathy                                                                     |

| Clinical events    | ICD 10 codes | ICD code heading                                  |
|--------------------|--------------|---------------------------------------------------|
| Heart failure      | I500         | Congestive heart failure (HF)                     |
|                    | I501         | Left ventricular failure or acute pulmonary edema |
|                    | I509         | Heart failure without precisions                  |
|                    | R570         | Cardiogenic shock                                 |
| Severe arrhythmias | I472         | Ventricular tachycardia                           |
|                    | I490         | Ventricular fibrillation                          |
| Sudden death       | I461         | Sudden death                                      |
| Stroke             | I64          | Stroke                                            |
| Endocarditis       | I33          | Endocarditis                                      |
| Pulmonary embolism | I26          | Pulmonary embolism                                |

**Table S2.** Codes used in France for procedures during hospitalization: Classification Commune des Actes Médicaux (CCAM).

| Procedures                              | Codes                                                                                              |
|-----------------------------------------|----------------------------------------------------------------------------------------------------|
| Implantation of a cardiac defibrillator | DELA004, DELF013; DELF014; DELF016; DELF020; DELF900                                               |
| Implantation of a pacemaker             | DELF001, DELF007, DELF005, DELF010, DELF012, DELF015, DELF901, DELF902, DELF903, DELF904, DELF905, |
| Heart transplantation                   | DZEA00, DZEA001, DZEA002, DZEA003, DZEA004                                                         |
| Mechanical circulatory assistance*      | EQLA008, EQLA009, EQLA010, Z994/Z998                                                               |

\*Include all types of mechanical mono- or biventricular assistance, with or without extracorporeal circulation.

Reference: Trombert-Paviot B, Rector A, Baud R, et al. The Development of CCAM: The New French Coding System of Clinical Procedures. Health Information Management. 2003 Mar;**31**(1):2–11.

**Table S3.** Inpatient prevalence of patients with cardiomyopathies per sex and per age classes.

|                                    | Gender | Age   | 2008  | 2009  | 2010  | 2011  | 2012  | 2013  | 2014  | 2015  |
|------------------------------------|--------|-------|-------|-------|-------|-------|-------|-------|-------|-------|
| <b>Dilated Cardiomyopathy</b>      |        |       |       |       |       |       |       |       |       |       |
|                                    | All    | 00-19 | 270   | 277   | 306   | 318   | 304   | 313   | 332   | 326   |
|                                    | All    | 20-59 | 7022  | 7104  | 7243  | 7187  | 7446  | 7576  | 7614  | 8113  |
|                                    | All    | ≥ 60  | 18937 | 18636 | 18254 | 18384 | 19066 | 19971 | 20738 | 22084 |
|                                    | All    | All   | 26229 | 26017 | 25803 | 25889 | 26816 | 27860 | 28684 | 30523 |
|                                    | Female | 00-19 | 111   | 107   | 127   | 145   | 136   | 138   | 147   | 149   |
|                                    | Female | 20-59 | 1829  | 1805  | 1849  | 1869  | 1963  | 2016  | 2045  | 2157  |
|                                    | Female | ≥ 60  | 7254  | 7121  | 7056  | 7033  | 7330  | 7652  | 8073  | 8624  |
|                                    | Female | All   | 9194  | 9033  | 9032  | 9047  | 9429  | 9806  | 10265 | 10930 |
|                                    | Male   | 00-19 | 159   | 170   | 179   | 173   | 168   | 175   | 185   | 177   |
|                                    | Male   | 20-59 | 5193  | 5299  | 5394  | 5318  | 5483  | 5560  | 5569  | 5956  |
|                                    | Male   | ≥ 60  | 11683 | 11515 | 11198 | 11351 | 11736 | 12319 | 12665 | 13460 |
|                                    | Male   | All   | 17035 | 16984 | 16771 | 16842 | 17387 | 18054 | 18419 | 19593 |
| <b>Other Cardiomyopathy</b>        |        |       |       |       |       |       |       |       |       |       |
|                                    | All    | 00-19 | 333   | 336   | 299   | 314   | 304   | 286   | 269   | 267   |
|                                    | All    | 20-59 | 3522  | 3310  | 3125  | 3254  | 3462  | 3544  | 3355  | 3096  |
|                                    | All    | ≥ 60  | 13422 | 12754 | 11879 | 11660 | 12504 | 12836 | 12522 | 12107 |
|                                    | All    | All   | 17277 | 16400 | 15303 | 15228 | 16270 | 16666 | 16146 | 15470 |
|                                    | Female | 00-19 | 138   | 135   | 108   | 111   | 127   | 112   | 101   | 103   |
|                                    | Female | 20-59 | 1063  | 1041  | 985   | 1033  | 1142  | 1215  | 1181  | 1183  |
|                                    | Female | ≥ 60  | 5820  | 5604  | 5203  | 5145  | 5607  | 5835  | 5921  | 5932  |
|                                    | Female | All   | 7021  | 6780  | 6296  | 6289  | 6876  | 7162  | 7203  | 7218  |
|                                    | Male   | 00-19 | 195   | 201   | 191   | 203   | 177   | 174   | 168   | 164   |
|                                    | Male   | 20-59 | 2459  | 2269  | 2140  | 2221  | 2320  | 2329  | 2174  | 1913  |
|                                    | Male   | ≥ 60  | 7602  | 7150  | 6676  | 6515  | 6897  | 7001  | 6601  | 6175  |
|                                    | Male   | All   | 10256 | 9620  | 9007  | 8939  | 9394  | 9504  | 8943  | 8252  |
| <b>Hypertrophic Cardiomyopathy</b> |        |       |       |       |       |       |       |       |       |       |
|                                    | All    | 00-19 | 351   | 312   | 317   | 338   | 325   | 313   | 350   | 404   |
|                                    | All    | 20-59 | 1865  | 1807  | 1769  | 1722  | 1682  | 1845  | 1902  | 2074  |
|                                    | All    | ≥ 60  | 5574  | 4773  | 4317  | 3988  | 3680  | 3591  | 3780  | 4089  |
|                                    | All    | All   | 7790  | 6892  | 6403  | 6048  | 5687  | 5749  | 6032  | 6567  |
|                                    | Female | 00-19 | 152   | 121   | 120   | 127   | 127   | 112   | 124   | 149   |
|                                    | Female | 20-59 | 502   | 514   | 507   | 505   | 466   | 507   | 590   | 606   |
|                                    | Female | ≥ 60  | 2554  | 2192  | 1912  | 1822  | 1633  | 1607  | 1688  | 1789  |
|                                    | Female | All   | 3208  | 2827  | 2539  | 2454  | 2226  | 2226  | 2402  | 2544  |
|                                    | Male   | 00-19 | 199   | 191   | 197   | 211   | 198   | 201   | 226   | 255   |
|                                    | Male   | 20-59 | 1363  | 1293  | 1262  | 1217  | 1216  | 1338  | 1312  | 1468  |
|                                    | Male   | ≥ 60  | 3020  | 2581  | 2405  | 2166  | 2047  | 1984  | 2092  | 2300  |
|                                    | Male   | All   | 4582  | 4065  | 3864  | 3594  | 3461  | 3523  | 3630  | 4023  |
| <b>Restrictive Cardiomyopathy</b>  |        |       |       |       |       |       |       |       |       |       |
|                                    | All    | 00-19 | 109   | 107   | 117   | 89    | 74    | 91    | 80    | 88    |
|                                    | All    | 20-59 | 366   | 411   | 374   | 387   | 424   | 414   | 416   | 396   |
|                                    | All    | ≥ 60  | 893   | 947   | 943   | 931   | 1145  | 1311  | 1491  | 1609  |

|                                |              |       |       |       |       |       |       |       |       |
|--------------------------------|--------------|-------|-------|-------|-------|-------|-------|-------|-------|
| All                            | <b>All</b>   | 1368  | 1465  | 1434  | 1407  | 1643  | 1816  | 1987  | 2093  |
| Female                         | <b>00-19</b> | 48    | 52    | 59    | 39    | 34    | 39    | 34    | 38    |
| Female                         | <b>20-59</b> | 139   | 161   | 156   | 178   | 193   | 191   | 180   | 181   |
| Female                         | <b>≥ 60</b>  | 386   | 396   | 437   | 408   | 499   | 590   | 665   | 669   |
| Female                         | <b>All</b>   | 573   | 609   | 652   | 625   | 726   | 820   | 879   | 888   |
| Male                           | <b>00-19</b> | 61    | 55    | 58    | 50    | 40    | 52    | 46    | 50    |
| Male                           | <b>20-59</b> | 227   | 250   | 218   | 209   | 231   | 223   | 236   | 215   |
| Male                           | <b>≥ 60</b>  | 507   | 551   | 506   | 523   | 646   | 721   | 826   | 940   |
| Male                           | <b>All</b>   | 795   | 856   | 782   | 782   | 917   | 996   | 1108  | 1205  |
| <b>All Type Cardiomyopathy</b> |              |       |       |       |       |       |       |       |       |
| All                            | <b>00-19</b> | 1063  | 1036  | 1040  | 1060  | 1007  | 1004  | 1031  | 1085  |
| All                            | <b>20-59</b> | 12833 | 12689 | 12580 | 12616 | 13089 | 13431 | 13348 | 13737 |
| All                            | <b>≥ 60</b>  | 38827 | 37110 | 35393 | 34963 | 36395 | 37709 | 38531 | 39889 |
| All                            | <b>All</b>   | 52723 | 50835 | 49013 | 48639 | 50491 | 52144 | 52910 | 54711 |
| Female                         | <b>00-19</b> | 449   | 419   | 415   | 423   | 424   | 402   | 406   | 439   |
| Female                         | <b>20-59</b> | 3591  | 3578  | 3566  | 3651  | 3839  | 3981  | 4057  | 4185  |
| Female                         | <b>≥ 60</b>  | 16015 | 15313 | 14608 | 14408 | 15069 | 15684 | 16347 | 17014 |
| Female                         | <b>All</b>   | 20055 | 19310 | 18589 | 18482 | 19332 | 20067 | 20810 | 21638 |
| Male                           | <b>00-19</b> | 614   | 617   | 625   | 637   | 583   | 602   | 625   | 646   |
| Male                           | <b>20-59</b> | 9242  | 9111  | 9014  | 8965  | 9250  | 9450  | 9291  | 9552  |
| Male                           | <b>≥ 60</b>  | 22812 | 21797 | 20785 | 20555 | 21326 | 22025 | 22184 | 22875 |
| Male                           | <b>All</b>   | 32668 | 31525 | 30424 | 30157 | 31159 | 32077 | 32100 | 33073 |

---

**Figure S1.** Flowchart of distinct patients who experienced at least one cardiomyopathy-related hospitalization from 2008 to 2015 in France.

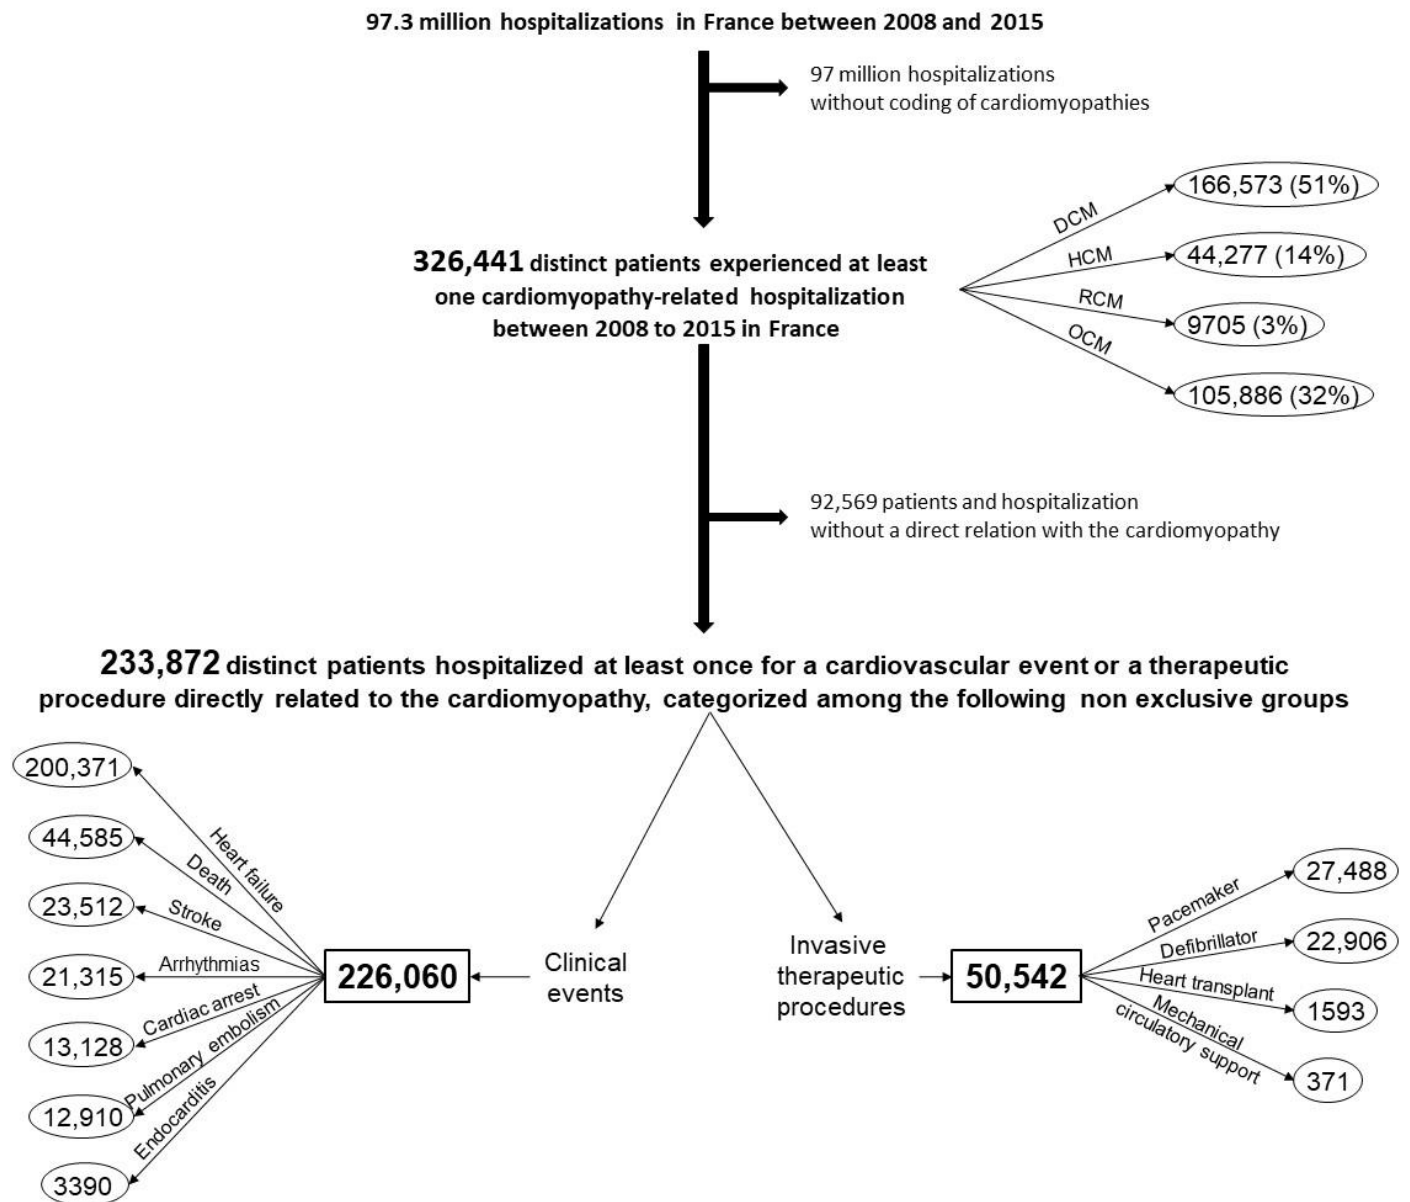

Supplement: s1 [file s1]
